# Supplementary material for: Effects of graphene coating and charge injection on water adsorption of solid surfaces
Source: Royal Society of Chemistry journal article supplement (doi:10.1039/c3nr02867d), 2013-01-01
Supplement: c3nr02867d.pdf [file c3nr02867d.pdf]

## Supplementary materials

### Water adsorption on free-standing monolayer graphene with and without charge injection

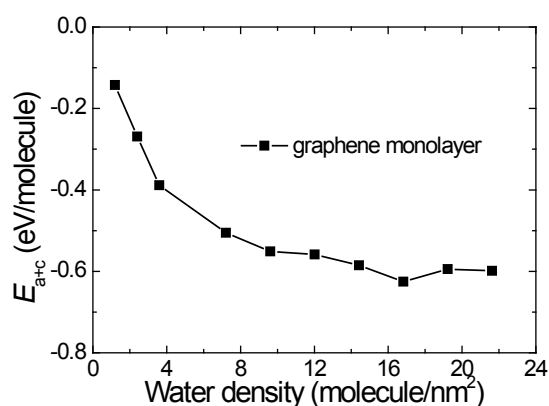

**Figure 1s.** The variation of the sum of adhesive and cohesive energy  $E_{a+c}$  for water adsorbing on an uncharged free-standing monolayer graphene with water density.

The sum of adsorption and cohesive energy is calculated by  $E_{a+c} = E_{wat/gra} - E_{gra} - nE_{wat}^1$ , here  $E_{wat/gra}$  is the total energy of relaxed water/graphene system,  $E_{gra}$  is the corresponding energy for graphene, and  $E_{wat}^1$  is the energy of a single water molecule and  $n$  is the number of water molecules.

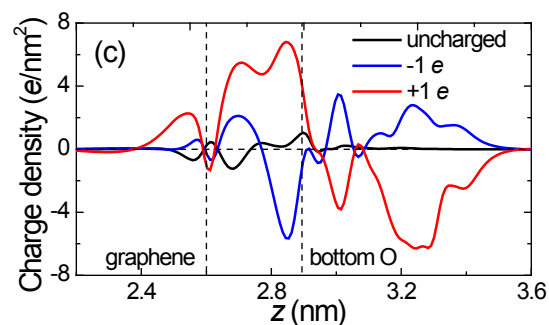

**Figure 2s.** The average charge density difference  $\Delta\rho_{xy}$  along the  $z$  direction for

water adsorbing on the uncharged and charged free-standing monolayer graphene.

For suspended graphene, the profiles of charge density difference shown in Figure 2s are similar to that of graphene-coated mica. The magnitude of the interfacial electron accumulation under  $+1e$  for the free-standing graphene is larger than that of other two graphene coating cases, leading to lower adsorption energy.

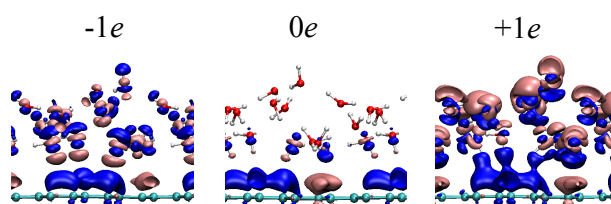

**Figure 3s.** Contour plots of the charge density difference  $\Delta\rho$  [in unit of  $0.005 e/(\text{\AA})^3$ ] of water adsorbing on the charged and uncharged free-standing graphene surface.

The range of charge density difference distributing on water at  $+1e$  is larger than that at  $-1e$ . The cohesive energies of water on the free-standing graphene are  $-7.99$  eV at  $-1e$  and  $-7.93$  eV at  $+1e$ , which is consistent with the distribution of charge density difference shown in Figure 3s.
